# Supplementary material for: Pseudopolymorphic seeding for the rational synthesis of hybrid membranes with a zeolitic imidazolate framework for enhanced molecular separation performance
Source: Royal Society of Chemistry journal article supplement (doi:10.1039/c5ta09979j), 2016-01-01
Supplement: c5ta09979j1.pdf [file c5ta09979j1.pdf]

## SUPPORTING INFORMATION

for

# Pseudopolymorphic seeding for rational synthesis of hybrid membranes with zeolitic imidazolate frameworks for enhanced molecular separation performance

*Yang Lo and Dun-Yen Kang\**

Department of Chemical Engineering, National Taiwan University

No. 1, Sec. 4, Roosevelt Road, Taipei 10617, Taiwan

\* E-mail: [dunyen@ntu.edu.tw](mailto:dunyen@ntu.edu.tw)

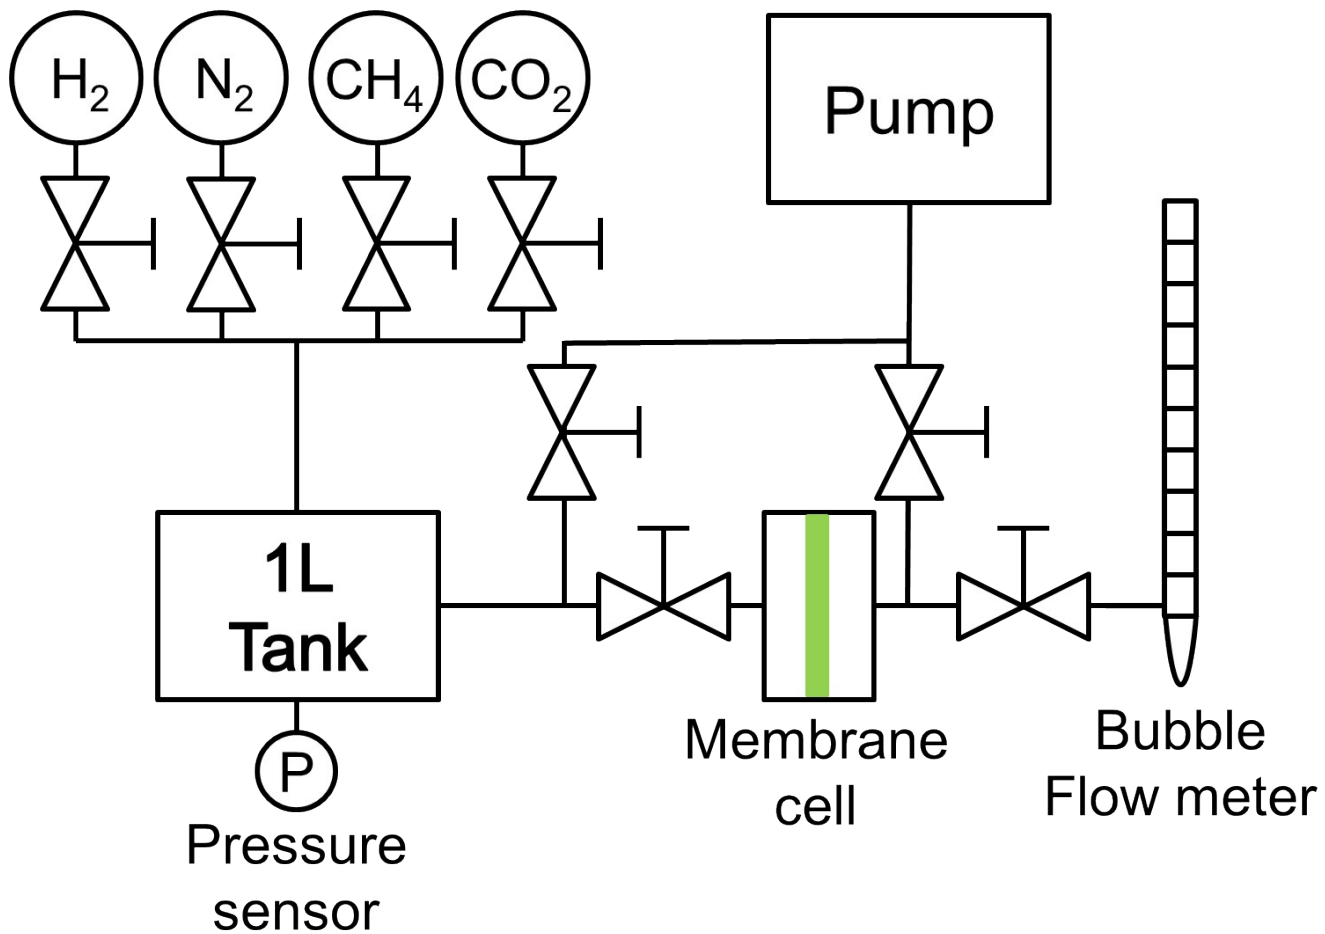

*Figure S1.* Illustration of proprietary single gas permeation setup used in this study

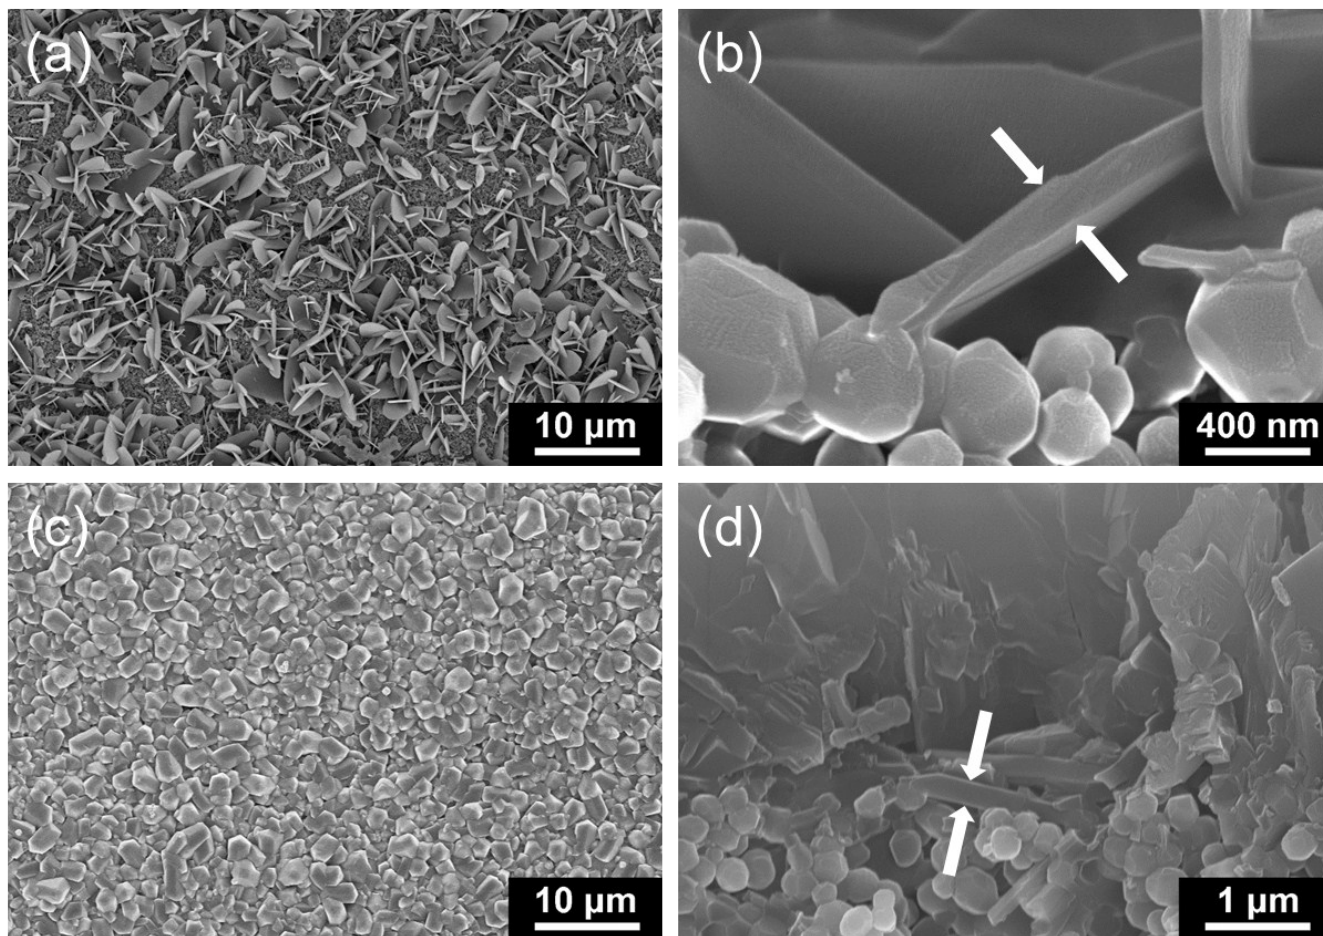

**Figure S2.** (a) Top-view and (b) side-view SEM images of ZIF-L seed layer; (c) top-view and (d) side-view of ZIF-L@ZIF-8 hybrid membrane. The white arrows indicate the location of ZIF-L crystals.

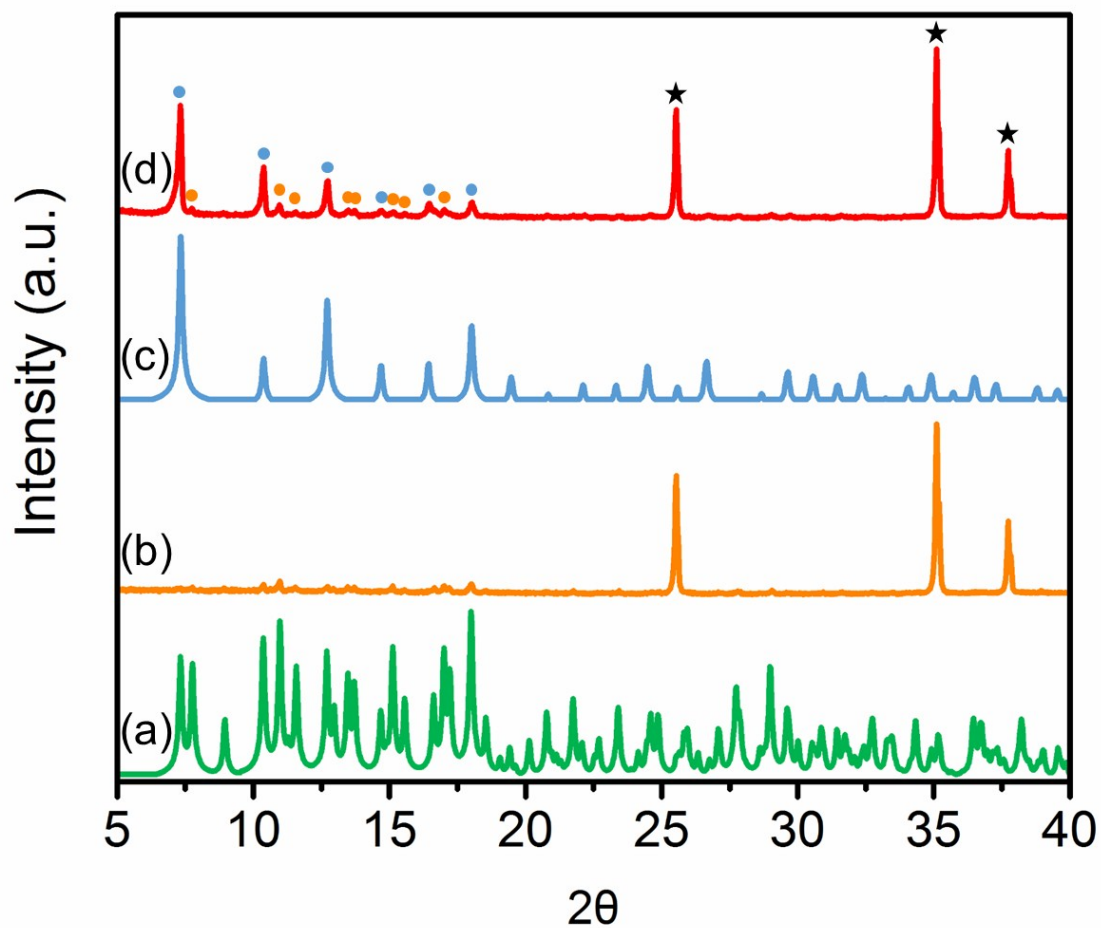

**Figure S3.** Simulated powder XRD patterns of (a) ZIF-L and (c) ZIF-8; experimentally-derived GIXRD patterns of (b) ZIF-L seed layer and (d) ZIF-L@ZIF-8 membrane. Asterisks denote signals from the  $\alpha$ -alumina substrate.

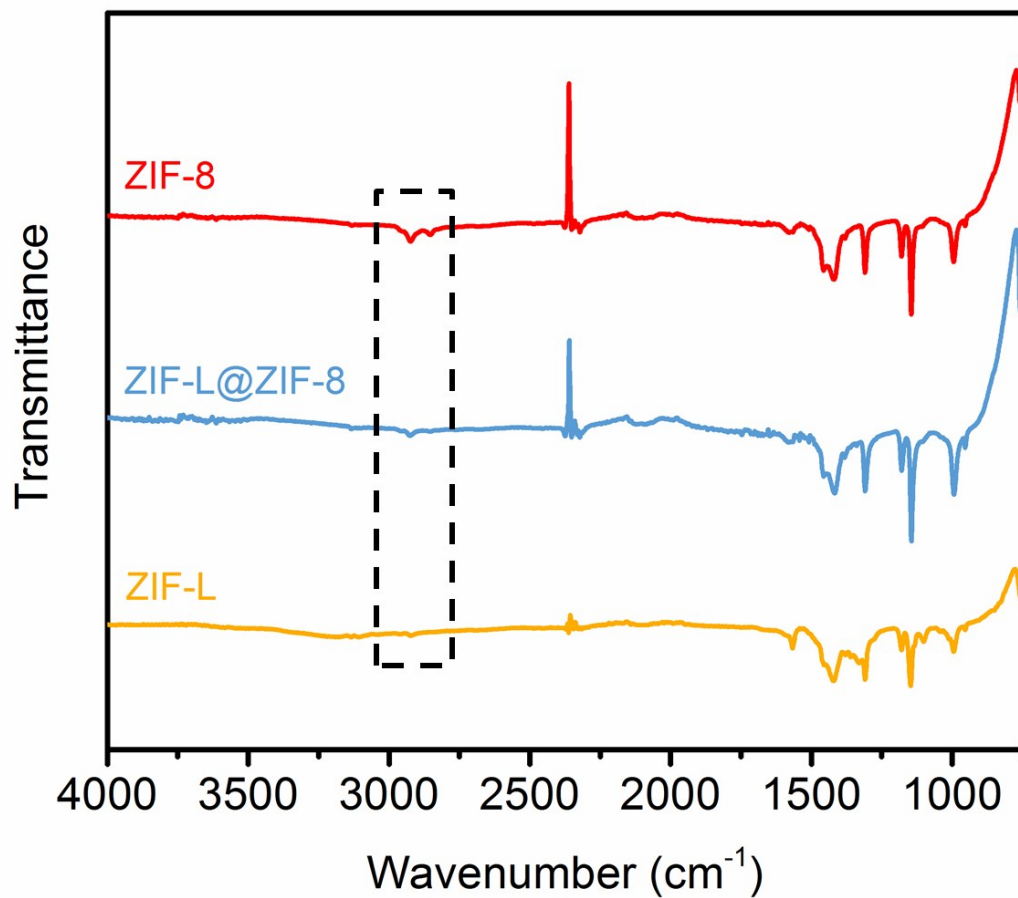

**Figure S4.** FT-IR spectra of ZIF-L seed layer, ZIF-L@ZIF-8 hybrid membrane, and pure ZIF-8 membrane. The dashed box highlights the difference between ZIF-8 and ZIF-L.

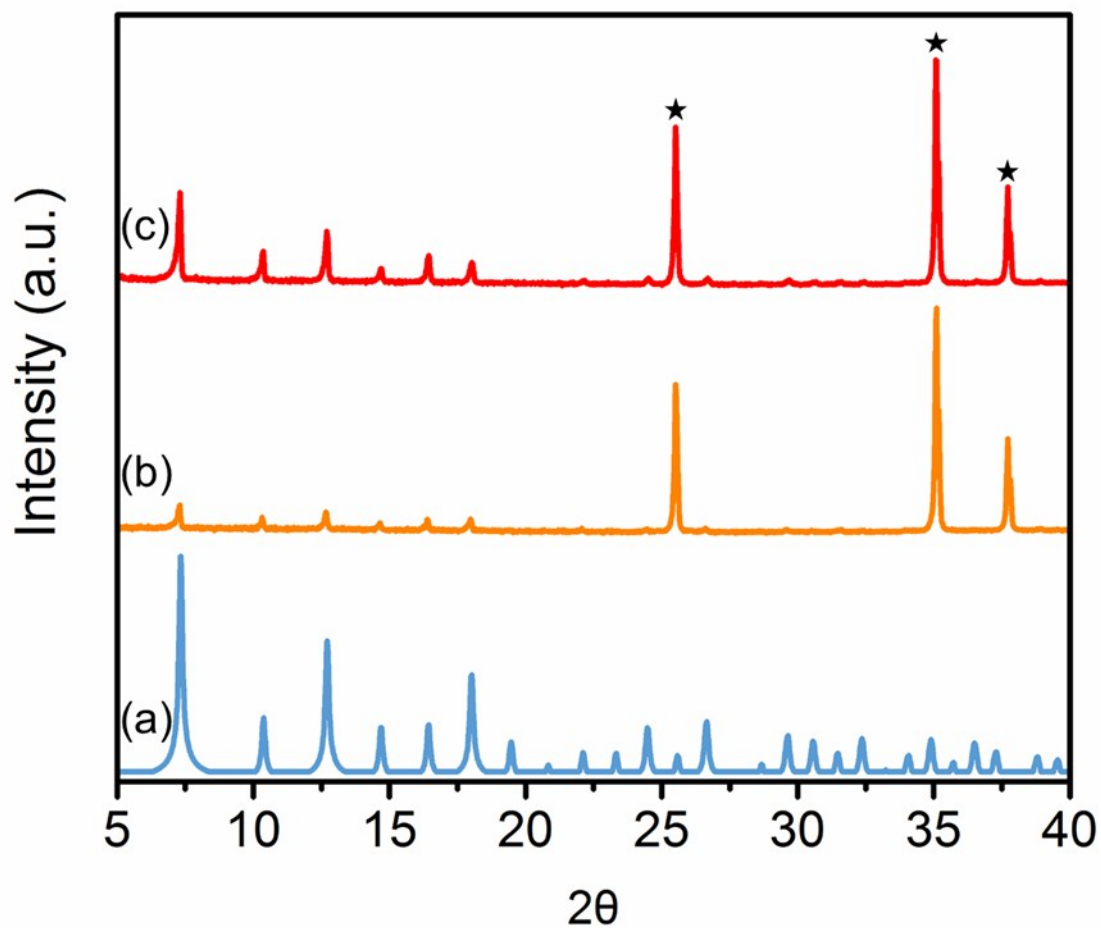

**Figure S5.** Simulated powder XRD patterns of (a) ZIF-8; experimentally-derived GIXRD patterns of (b) ZIF-8 seed layer and (c) ZIF-8 membrane. Asterisks denote signals from the  $\alpha$ -alumina substrate.

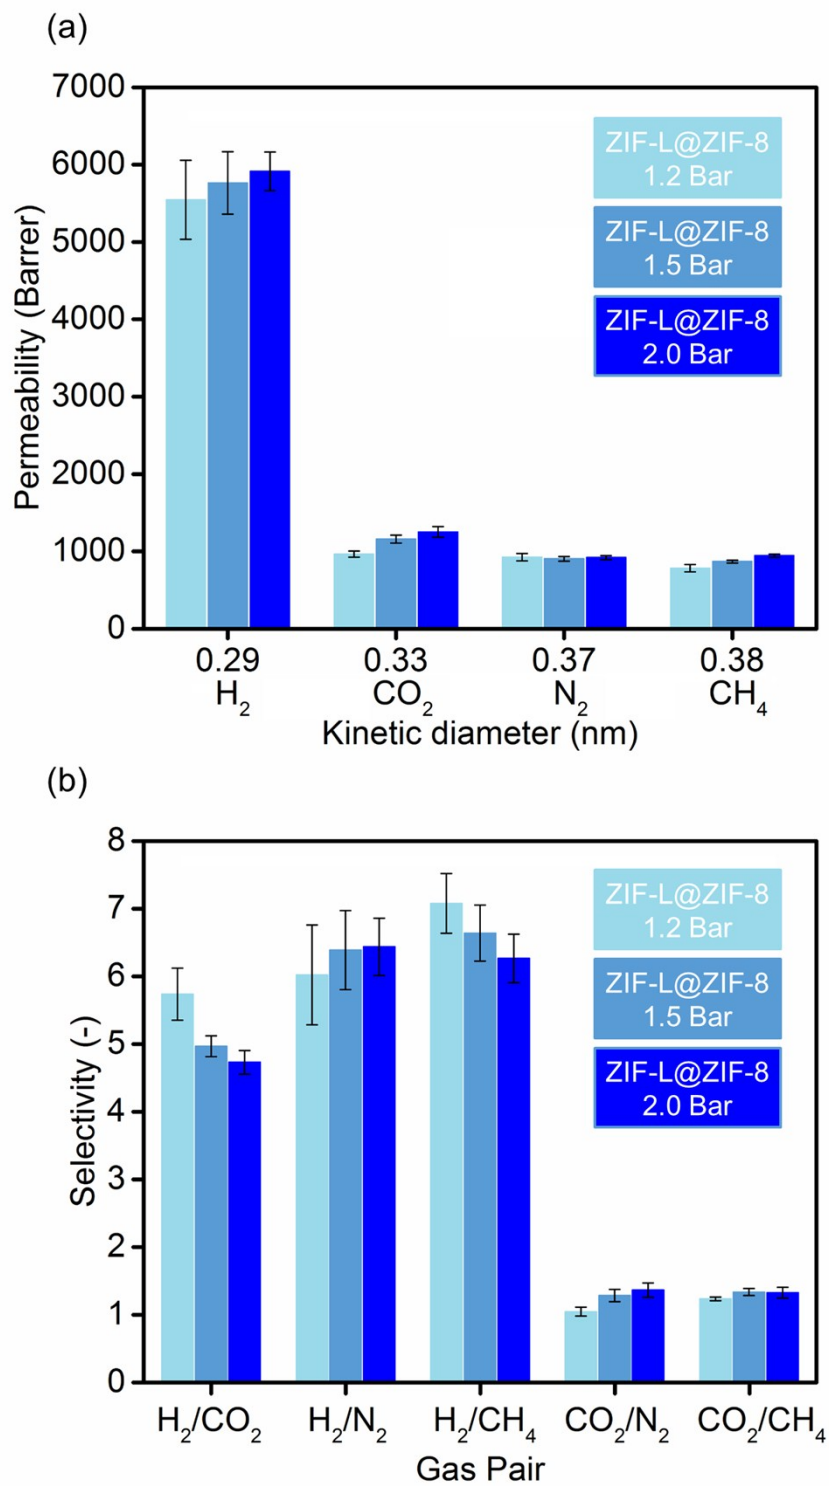

**Figure S6.** (a) Single gas permeability of ZIF-L@ZIF-8 membranes under feed pressure of 1.2, 1.5 and 2 bar; (b) ideal selectivity of ZIF-L@ZIF-8 membranes under feed pressure of 1.2, 1.5 and 2 bar.
